# Supplementary material for: Changes in Soil Characteristics, Microbial Metabolic Pathways, TCA Cycle Metabolites and Crop Productivity following Frequent Application of Municipal Solid Waste Compost
Source: MDPI journal article supplement (doi:10.3390/plants11223153), 2022-11-18
Supplement: s1 [file s1]

Table S1. Climate conditions in Brandon, Manitoba during the growing season between May to August 2015 to 2019, and 30-year average (1981-2010) (Government of Canada, 2020).

| Monthly temperature (°C) |         |         |         |         |         |         |         |         |             |
|--------------------------|---------|---------|---------|---------|---------|---------|---------|---------|-------------|
| Year                     | May     |         | June    |         | July    |         | August  |         | Annual mean |
|                          | Maximum | Minimum | Maximum | Minimum | Maximum | Minimum | Maximum | Minimum |             |
| 2019                     | 17.3    | 0.4     | 23.9    | 8.7     | 25.7    | 11.8    | 24      | 8.8     | 15.1        |
| 2018                     | 23.2    | 4.5     | 25.7    | 11.5    | 26.2    | 10.8    | 26.8    | 7.9     | 17.1        |
| 2017                     | 18.8    | 3.4     | 22.9    | 8.8     | 26.7    | 11.2    | 25.3    | 8.8     | 15.7        |
| 2016                     | 21      | 4.9     | 23.9    | 10      | 25.1    | 12      | 25.3    | 9.5     | 16.5        |
| 2015                     | 18.4    | 1.8     | 24.3    | 9.6     | 26.1    | 12.2    | 26.2    | 9.8     | 16.1        |
| 1981-2010                | 17.8    | 3.4     | 22.4    | 9.3     | 25.2    | 11.7    | 24.9    | 10.4    | 15.6        |
| Total precipitation (mm) |         |         |         |         |         |         |         |         |             |
| Year                     | May     |         | June    |         | July    |         | August  |         | Annual Mean |
| 2019                     | 42.9    |         | 78.2    |         | 48.2    |         | 27.6    |         | 49.2        |
| 2018                     | 24.0    |         | 85.2    |         | 52.6    |         | 25.4    |         | 46.8        |
| 2017                     | 21.4    |         | 70.6    |         | 36      |         | 37.4    |         | 41.4        |

|           |      |       |      |      |      |
|-----------|------|-------|------|------|------|
| 2016      | 55.4 | 106.4 | 98   | 0    | 65.0 |
| 2015      | 48.6 | 37.4  | 64.8 | 50.4 | 50.3 |
| 1981-2010 | 59.1 | 80.7  | 73.4 | 65.9 | 69.8 |

Table S2. Five-year average chemical elements concentration of municipal solid waste compost.

| Property                     | Value | Element    | Value<br>(%) | Element   | Value<br>(%) |
|------------------------------|-------|------------|--------------|-----------|--------------|
| pH                           | 8.7   | Nitrogen   | 1.06         | Manganese | 118          |
| Lime index                   | 6.9   | Phosphorus | 573          | Iron      | 141          |
| Soluble salt (mS/cm)         | 4.9   | Potassium  | 5359         | Copper    | 2.0          |
| Available OM <sup>1</sup>    | 14.7  | Magnesium  | 836          | Boron     | 3.5          |
| CEC <sup>2</sup> (meq/100 g) | 55.2  | Calcium    | 6187         | Sodium    | 833          |
| Nitrate-nitrogen (mg/kg)     | 58.0  | Sulphur    | 171          | Mg:K      | 1:1          |
|                              |       | Zinc       | 17.8         | Ca:Mg     | 4:1          |

<sup>1</sup>OM, percentage available organic matter content; and <sup>2</sup>CEC, cation exchange capacity.

Table S3. Summary of deblur output samples.

| Metric                                                       | 16S rRNA | ITS2    |
|--------------------------------------------------------------|----------|---------|
| Deblur output statistics                                     |          |         |
| Number of samples                                            | 45       | 45      |
| Number of features                                           | 55,483   | 1,281   |
| Total frequency                                              | 892,582  | 188,044 |
| Minimum frequency                                            | 7,570    | 280     |
| 1st quartile                                                 | 16,102   | 2,032   |
| Median frequency                                             | 19,867   | 3,701   |
| 3rd quartile                                                 | 23,740   | 5,391   |
| Maximum frequency                                            | 33,775   | 14,051  |
| Mean frequency                                               | 19,835   | 4,178   |
| Statistics after quality control and normalization           |          |         |
| Number of samples after normalization                        | 43       | 39      |
| Number of features after quality control and normalization   | 1,768    | 721     |
| Total frequency after quality control and normalization      | 273,050  | 46,254  |
| Frequency per sample after quality control and normalization | 6,350    | 1,186   |

Table S4. Relative abundances of major soil microbial taxa.

| Taxa                                                                                                                 | Relative abundances |
|----------------------------------------------------------------------------------------------------------------------|---------------------|
| <b>Fungi</b>                                                                                                         |                     |
| Basidiomycota<br>Tremellomycetes – 24%<br>Agaricomycetes – 11%<br>Ustilaginomycetes – 6%<br>Other – <1%              | 42%                 |
| Mortierellomycota<br>Mortierellomycetes – 41%<br>Other – <1%                                                         | 41%                 |
| Ascomycota                                                                                                           | 5%                  |
| Chytridiomycota                                                                                                      | 4%                  |
| Others                                                                                                               | 8%                  |
| <b>Bacterial</b>                                                                                                     |                     |
| Actinobacteria<br>Actinobacteria – 17%<br>Rubrobacteria – 7%<br>Thermoleophilia – 6%<br>MB-A2-108 – 3%<br>Other – 1% | 35%                 |
| Proteobacteria<br>Alphaproteobacteria – 14%<br>Gammaproteobacteria – 5%<br>Deltaproteobacteria – 5%<br>Other - <1%   | 23%                 |
| Acidobacteria<br>Subgroup 6- 7%<br>Blastocatellia (Subgroup 4) – 2%<br>Other – 1%                                    | 11%                 |
| Chloroflexi<br>Anaerolineae – 6%<br>Chloroflexia – 2%<br>Other – 3%                                                  | 11%                 |
| Bacteroidetes<br>Bacteroidia – 5%<br>Other - <1%                                                                     | 5%                  |
| Firmicutes                                                                                                           | 3%                  |
| Gemmatimonadetes                                                                                                     | 3%                  |
| Other                                                                                                                | 6%                  |

Table S5. Variations in soil sample microbial groupings explained by weighted UniFrac beta-diversity distances.

| Grouping (subset) <sup>a</sup>             | ITS (R <sup>2</sup> ) | 16S rRNA (R <sup>2</sup> ) |
|--------------------------------------------|-----------------------|----------------------------|
| Soil treatment combined                    | 0.085*                | 0.442***                   |
| Annual versus No compost application       | 0.050ns               | 0.507***                   |
| Biennial versus No compost application     | 0.080*                | 0.257***                   |
| Annual versus Biennial compost application | 0.067*                | 0.249***                   |

Adonis tests were used to assess whether beta-diversity is related to sample groupings, 999 permutations; R<sup>2</sup>, coefficient of correlation; \*, \*\*\* are significant at P < 0.05 and P < 0.001, respectively; ns, not significant at P > 0.05.

Table S6. Concentrations of essential and beneficial chemical elements in edible portions of green beans (*Phaseolus vulgaris* cv. Golden Wax), beets (*Beta vulgaris* cv. Detroit Supreme) and lettuce (*Latuca sativa* cv. Grand Rapids) as affected by frequency of application of municipal solid waste compost.

| Chemical elements | Green beans (mg/kg) |          |         | Beets (mg/kg) |          |         | Lettuce (mg/kg) |          |         | CV <sup>1</sup> |
|-------------------|---------------------|----------|---------|---------------|----------|---------|-----------------|----------|---------|-----------------|
|                   | Annual              | Biennial | Control | Annual        | Biennial | Control | Annual          | Biennial | Control |                 |
| Total nitrogen    | 1600                | 700      | 600     | <100          | <100     | <100    | 4900            | 1200     | 200     | 0.81            |
| Phosphorus        | 4060                | 4040     | 3650    | 2910          | 2990     | 2000    | 4200            | 4170     | 2570    | 3.05            |
| Potassium         | 34850               | 25000    | 23700   | 34700         | 25600    | 21300   | 96600           | 67600    | 37800   | 5.75            |
| Magnesium         | 2395                | 2650     | 2360    | 2220          | 2120     | 2210    | 4600            | 4980     | 5930    | 1.95            |
| Calcium           | 4090                | 4000     | 4310    | 1810          | 1590     | 2270    | 12400           | 13100    | 13600   | 1.21            |
| Boron             | 19.2                | 18.6     | 23.0    | 19.4          | 18.0     | 18.3    | 23.2            | 23.8     | 24.6    | 0.22            |
| Iron              | 62                  | 65       | 74      | 43            | 39       | 36      | 364             | 259      | 258     | 1.29            |
| Manganese         | 19                  | 19       | 20      | 33.9          | 29.6     | 30.7    | 91              | 95.8     | 81.9    | 0.91            |
| Molybdenum        | 7.39                | 7.55     | 3.26    | 0.91          | 0.65     | 0.52    | 4.13            | 4.34     | 2.12    | 0.11            |

|          |      |      |      |      |      |      |      |      |      |      |
|----------|------|------|------|------|------|------|------|------|------|------|
| Cobalt   | 0.12 | 0.13 | 0.11 | 0.03 | 0.03 | 0.04 | 0.17 | 0.13 | 0.15 | 0.02 |
| Sodium   | 40   | 30   | 40   | 7830 | 5370 | 2530 | 3490 | 2050 | 2020 | 2.00 |
| Chromium | 1.80 | 0.3  | 0.6  | 0.4  | 0.3  | 0.2  | 3.7  | 3.5  | 3.6  | 0.01 |
| Copper   | 4.7  | 5.7  | 5.0  | 8.5  | 6.0  | 4.9  | 5.9  | 6.3  | 7.3  | 0.32 |
| Nickel   | 1.6  | 1.5  | 1.3  | 1.2  | 1.3  | 0.2  | 1.9  | 5.1  | 2.6  | 0.02 |
| Zinc     | 20.6 | 21.5 | 18.9 | 30   | 21.8 | 18.4 | 37.1 | 30.2 | 31.9 | 1.91 |

---

<sup>1</sup>Nitrate and nitrite as total nitrogen; CV (%), coefficient of variation (source: Abbey et al., 2021).
